# Supplementary material for: Preferential Accumulation of Phospholipid-PEG and Cholesterol-PEG Decorated Gold Nanorods into Human Skin Layers and Their Photothermal-Based Antibacterial Activity
Source: PubMed Central journal article supplement (PMC6453979; doi:10.1038/s41598-019-42047-7), 2019-04-08
Supplement: 41598_2019_42047_MOESM1_ESM.pdf [file 41598_2019_42047_MOESM1_ESM.pdf]

## Supplementary Information

### **Preferential Accumulation of Phospholipid-PEG and Cholesterol-PEG Decorated Gold Nanorods into Human Skin Layers and their Photothermal-Based Antibacterial Activity**

**Nouf N. Mahmoud<sup>1\*</sup>, Ala A. Alhusban<sup>1</sup>, Jamila Isabilla Ali<sup>1</sup>, Amal G. Al-Bakri<sup>2</sup>, Rania Hamed<sup>1</sup>, Enam A. Khalil<sup>2</sup>**

<sup>1</sup> Department of Pharmacy, Faculty of Pharmacy, Al-Zaytoonah University of Jordan,  
Amman 11733, Jordan.

<sup>2</sup> Department of Pharmaceutics & Pharmaceutical Technology, School of Pharmacy, The  
University of Jordan, Amman 11942, Jordan.

*\*Corresponding author:* E-mail: [nouf.mahmoud@zuj.edu.jo](mailto:nouf.mahmoud@zuj.edu.jo)

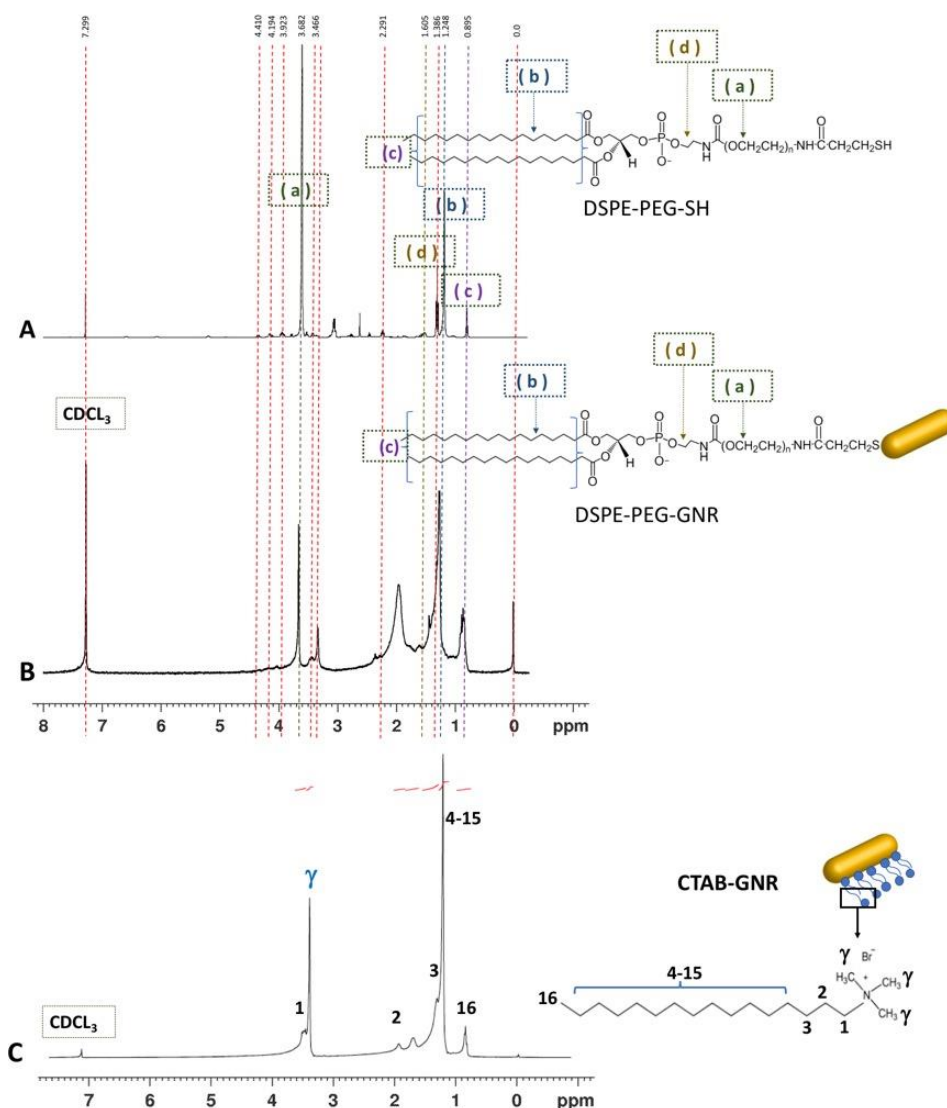

**Figure S1.**  $^1\text{H-NMR}$  spectra of DSPE-PEG-SH, DSPE-PEG-GNR and CTAB-GNR. Combined  $^1\text{H-NMR}$  spectra of **A.** DSPE-PEG-SH and **B.** DSPE-PEG-GNR show the signals similarity of characteristic chemical shift values with slightly broadened and shifted peaks upon attachment to GNR; (a) a characteristic sharp peak of repeated units of PEG at  $\sim 3.68$  ppm; (b) a characteristic sharp peak of methylene groups of DSPE at  $\sim 1.25$  ppm; (c) a characteristic peak of the methyl group of DSPE at  $\sim 0.89$  ppm; (d) a characteristic peak of the methylene groups attached to amide at 1.60 ppm. **C.**  $^1\text{H-NMR}$  spectrum of CTAB-GNR showed a

characteristic sharp peak of the  $\gamma$ -methyl protons at  $\sim 3.39$  ppm that was reduced dramatically upon displacement of CTAB by DSPE-PEG-SH. All the spectra were acquired in  $\text{CDCl}_3$ .

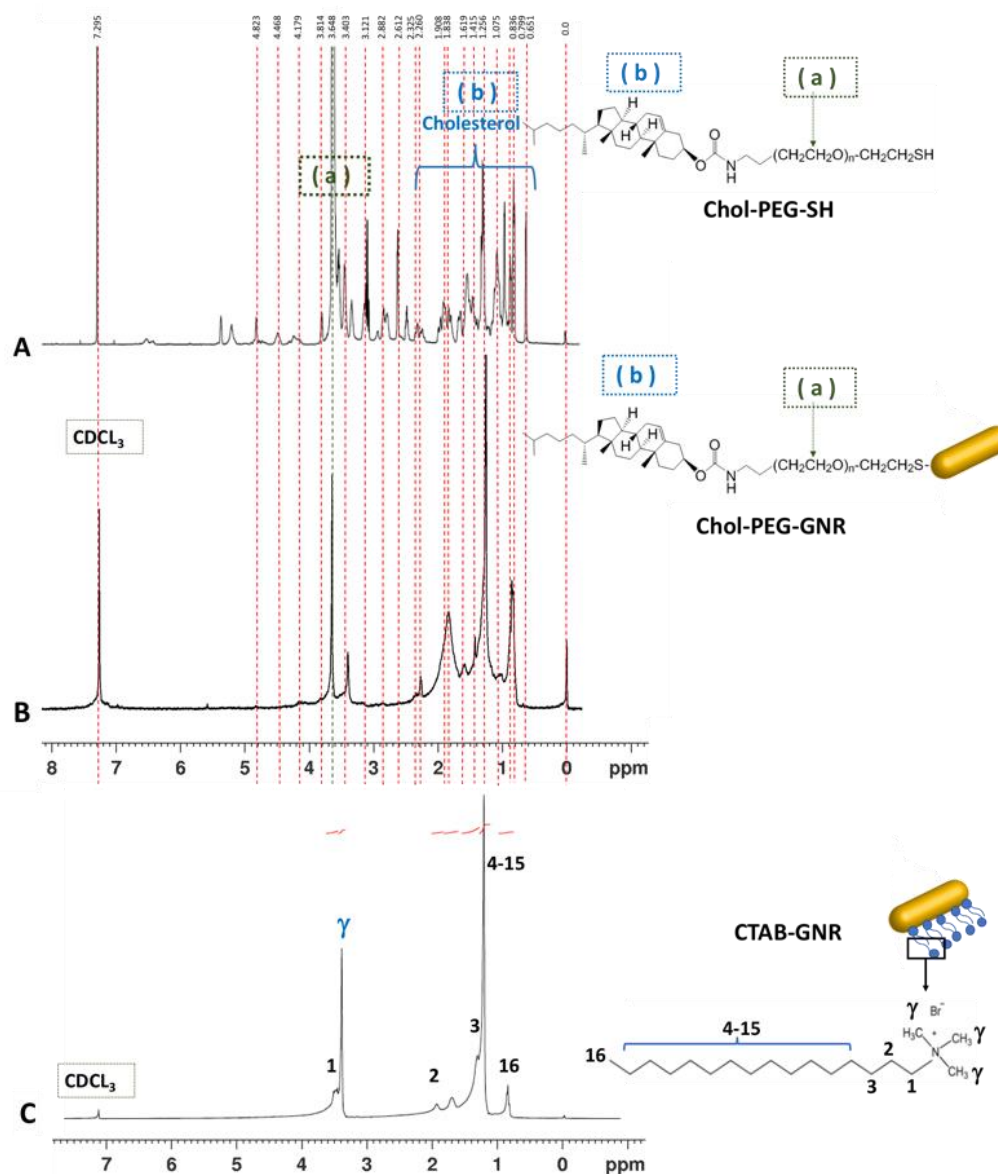

**Figure S2.**  $^1\text{H-NMR}$  spectra of Chol-PEG-SH, Chol-PEG-GNR and CTAB-GNR. Combined  $^1\text{H-NMR}$  spectra of **A.** Chol-PEG-SH and **B.** Chol-PEG-GNR show the signals similarity of characteristic chemical shift values with slightly broadened and shifted peaks upon attachment to GNR; (a) a characteristic sharp peak of repeated units of PEG at  $\sim 3.68$  ppm; (b)

Characteristic peaks of cholesterol protons. C.  $^1\text{H-NMR}$  spectrum of CTAB-GNR showed a characteristic sharp peak of  $\gamma$ -methyl protons at  $\sim 3.39$  ppm that was reduced dramatically upon displacement of CTAB by Chol-PEG-SH. All the spectra were acquired in  $\text{CDCl}_3$ .

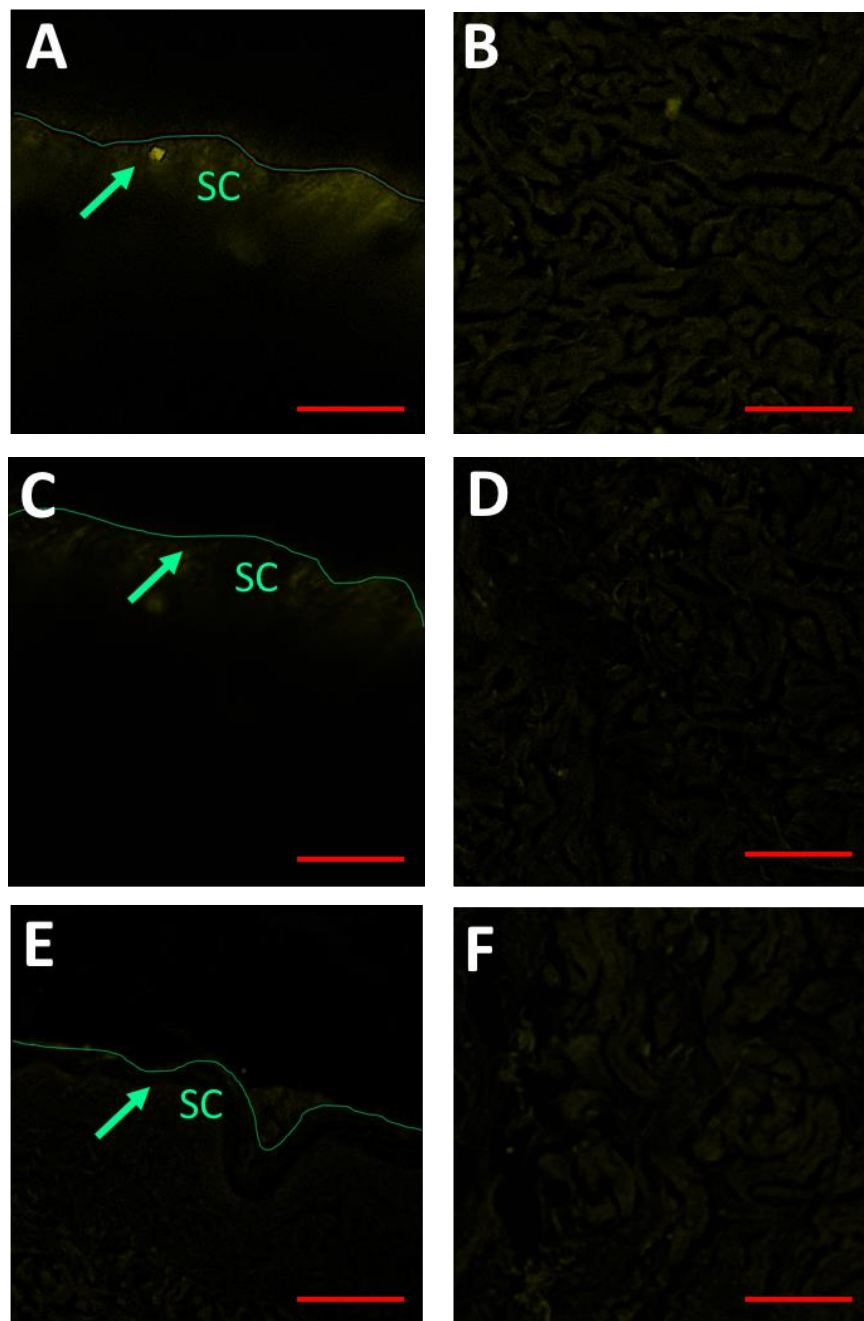

**Figure S3.** Confocal fluorescence microscopy images of skin samples pre-treated with m-PEG-GNR,  $\text{NH}_2$ -PEG-GNR and  $\text{COOH}$ -PEG-GNR. **A & B.** SC and dermis of skin pre-treated with m-PEG-GNR, respectively. **C & D.** SC and dermis of skin pre-treated with  $\text{NH}_2$ -PEG-GNR respectively. **E & F.** SC and dermis of skin pre-treated with  $\text{COOH}$ -PEG-GNR, respectively.

All the images showed low fluorescence intensity of the neutral or charged PEGylated GNR applied to skin samples. Scales = A, C and E = 200  $\mu\text{m}$ , B, D and F = 100  $\mu\text{m}$ .

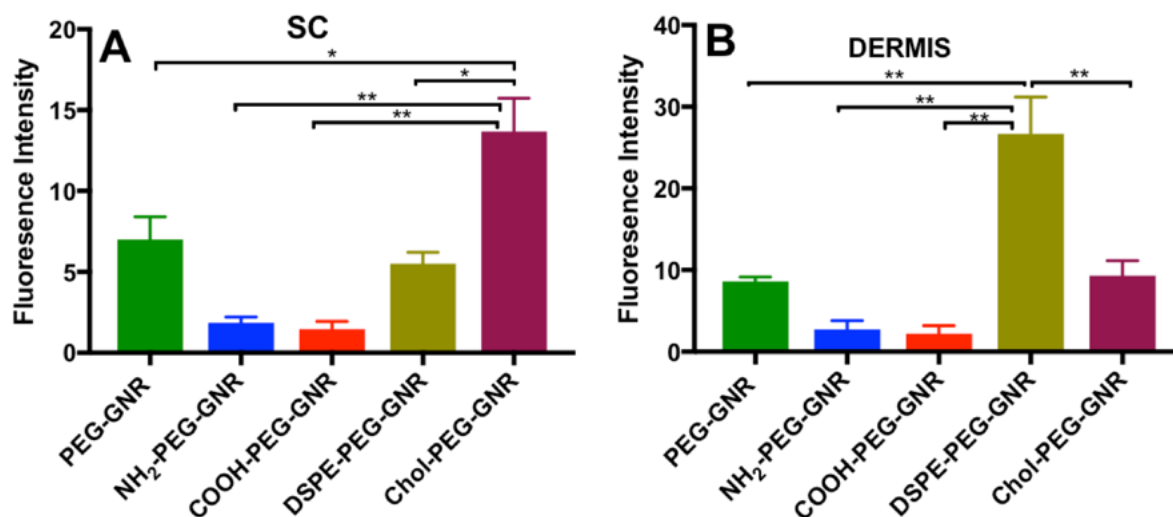

**Figure S4.** Fluorescence intensities of GNR of different surface functionalities that accumulated into: **A.** Stratum corneum layers, and **B.** Dermis layer. Data are given as mean  $\pm$  SD (n = 3). Unpaired t-test was used to evaluate the differences; \* p < 0.05, \*\* p < 0.01.
